# Supplementary material
Source: Research Square preprint supplement (doi:10.21203/rs.3.rs-8998292/v1)
Supplement: Supplementary file 1 [file 0c92adb1344d29fe6e8cb375.docx]

Fig. S │ A XRD of the as received and 5 mins spex milled powder showing the presence of t-ZrO2 impurity, B SEM image of the 5 mins spex milled powder

Table S│ Materials Properties for Simulation

|  | **Electrical conductivity (S/m)** | **Density (kg/m3)** | **Thermal conductivity (W/m.K)** | **Heat capacity (J/kg.K)** | **Surface emissivity** |
| --- | --- | --- | --- | --- | --- |
| **Graphite** | 80000 | 1900 | 123 − 6.99*10−2 *T + 1.55*10−5 *T2 (298-2000K)1 | 34.27 + 2.72*T − 9.60*10−4*T2 (298-2000K)1 | 0.9 |
| **Hexagonal boron nitride (h-BN)** | 1E-10 | 2300 | 400 | 1000 |  |
| **Zirconium nitride (ZrN)** | Figure 3 | 2 | 3 | **COMSOL materials library** |  |
| **Copper** | 6E+07 | 8960 | 400 | 385 | 0.17 |

**Equations of functions in Fig. 2:**

Linear:

Polynomial:

Exponential:

Sigmoidal (2 Step S):

σ298K= 1.75 S/cm, σ1973K= 400 S/cm, A= 0.08, B1= −0.03, C= −0.6, B2= −0.013 T1= 540 K, T2=1350K


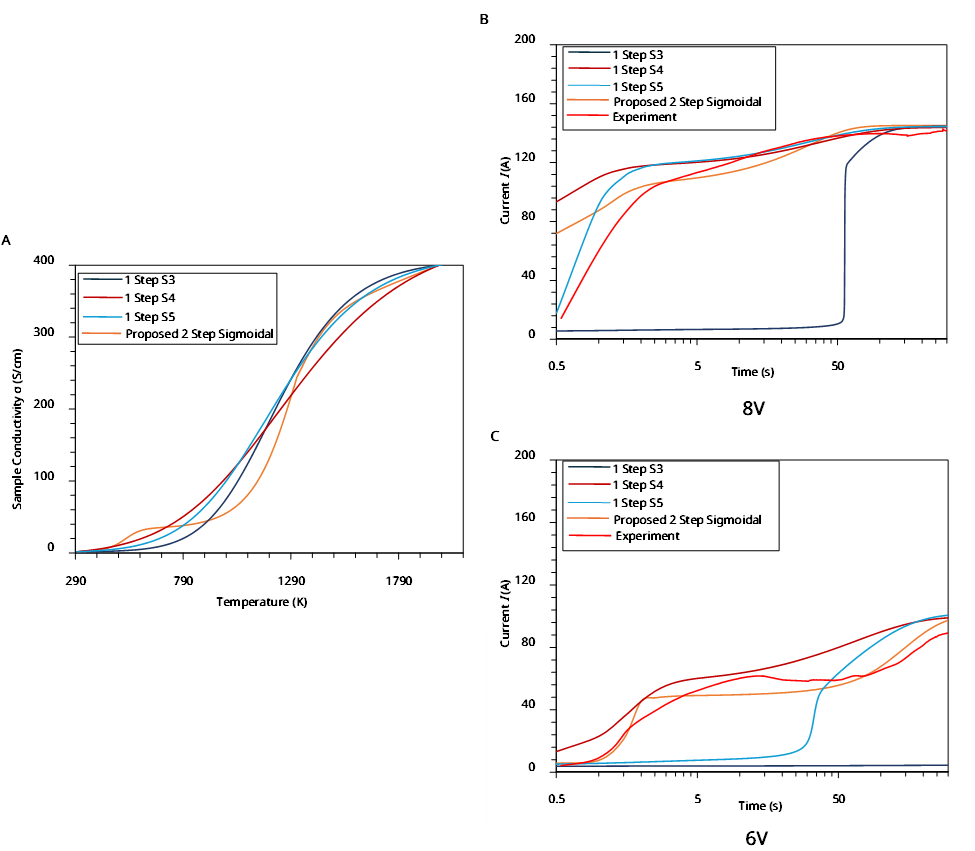


Fig. S │ A Possible different S shaped evolution along with the proposed 2 step sigmoidal function of sample conductivity with temperature and Current vs time for experiment and simulations for those assumptions under B 8 and C 6 V.

Fig. S │ Thermal conductivity vs temperature for Mo4 and Graphite1

Fig. S │ A Schematic showing position of point 1 and 2 in the sample. Net heating power density or NHPD (calculated from subtracting heat dissipation from heat generation for unit volume in each point) and temperature vs time for point 1 and 2 using both B Mo and C graphite electrode

Fig. S │ Simulated temperature vs time for 6.4 mm and 3.2 mm diameter sample with 6.4 mm diameter electrodes

Fig. S │ A Current and voltage vs time for a 4 mm thick (6.4 mm diameter) sample FS. B SEM of the fractured sample


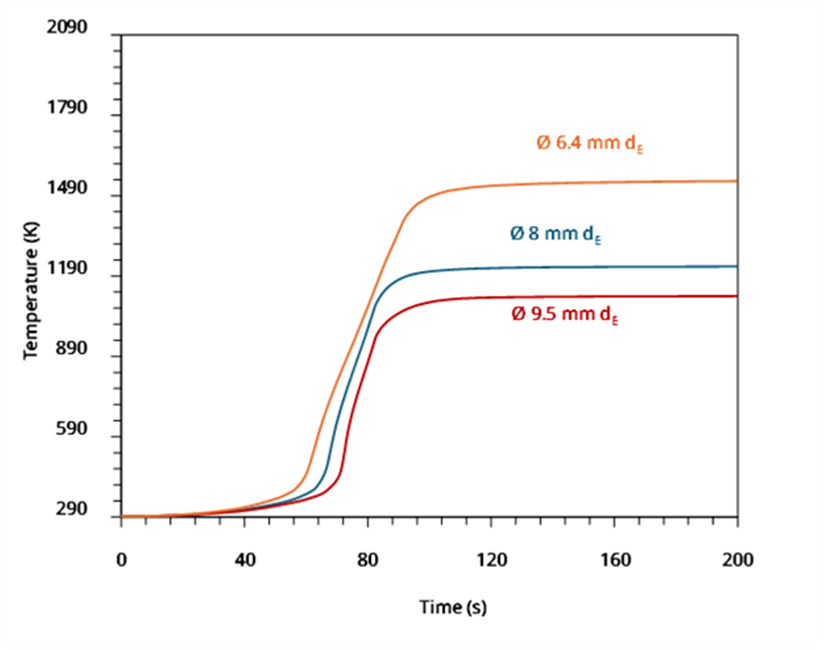


Fig. S 7│ Simulated temperature vs time for 6.4 mm diameter sample using 6.4, 8 and 9.5 mm diameter electrodes

Fig. S 8│ Simulated temperature vs time for 3.2 mm sample FS using polycrystalline ceramic wool and h-BN tube as thermal insulation

**References**

1. Manière, C. *et al.* Contact resistances in spark plasma sintering: From in-situ and ex-situ determinations to an extended model for the scale up of the process. *J. Eur. Ceram. Soc.* **37**, 1593–1605 (2017).

2. Tang, Y. *et al.* Densification and mechanical properties of hot-pressed ZrN ceramics doped with Zr or Ti. *J. Eur. Ceram. Soc.* **33**, 1363–1371 (2013).

3. Basini, V., Ottaviani, J. P., Richaud, J. C., Streit, M. & Ingold, F. Experimental assessment of thermophysical properties of (Pu, Zr)N. in *Journal of Nuclear Materials* vol. 344 186–190 (Elsevier, 2005).

4. Kota, S. *et al.* Synthesis and characterization of an alumina forming nanolaminated boride: MoalB. *Sci. Rep.* **6**, (2016).
